# Supplementary material for: Choroidal Changes in Rhesus Macaques in Aging and Age-Related Drusen
Source: PubMed Central journal article supplement — Invest Ophthalmol Vis Sci. 2023 Sep 29;64(12):44. doi: 10.1167/iovs.64.12.44 (PMC10547013; doi:10.1167/iovs.64.12.44), 2023-09-29
Supplement: iovs-64-12-44_s001.pdf [file iovs-64-12-44_s001.pdf]

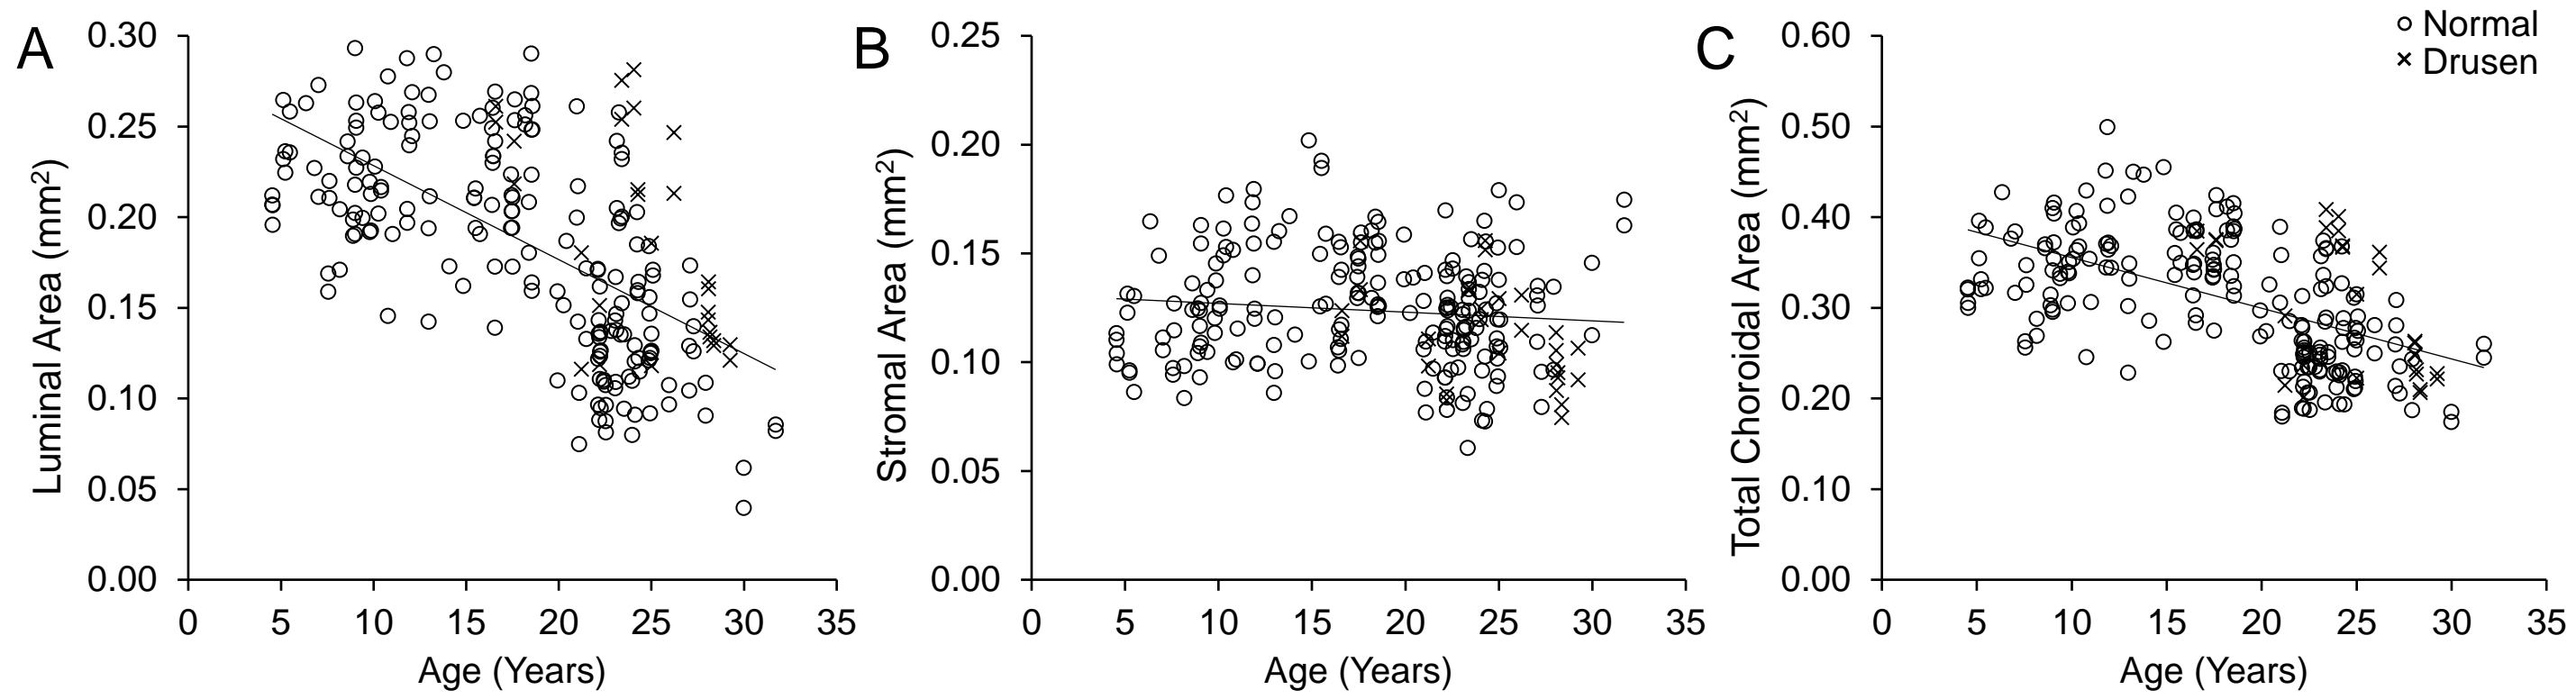

**Supplementary Figure 1. Choroidal vascularity in aging.**

Scatterplots of **(A)** luminal area, **(B)** stromal area, and **(C)** total choroidal area compared to age of rhesus macaques in this study, separated by drusen (*cross mark*) and normal eyes (*circle*).
